# Supplementary material for: Post-Concussion Symptoms Rule: Derivation and Validation of a Clinical Decision Rule for Early Prediction of Persistent Symptoms after a Mild Traumatic Brain Injury
Source: PubMed Central journal article supplement — J Neurotrauma. 2022 Sep 29;39(19-20):1349–62. doi: 10.1089/neu.2022.0026 (PMC9529302; doi:10.1089/neu.2022.0026), 2022-09-29
Supplement: Suppl_FileS2.pdf [file Suppl_FileS2.pdf]

|                      |                      |                      |                      |                      |                      |                      |                      |  |
|----------------------|----------------------|----------------------|----------------------|----------------------|----------------------|----------------------|----------------------|--|
| <input type="text"/> |  |
| Center#              |                      | Subject #            |                      |                      | Initials             |                      |                      |  |

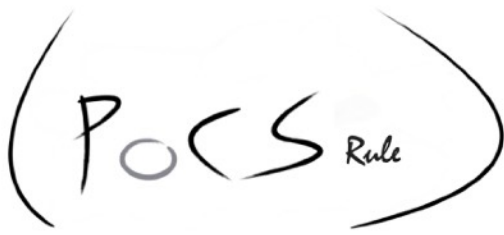

### Validation PoCS Rule

**PoCS Questionnaire  
Phone Follow-up**

- 7 day Follow-Up       30 day Follow-Up       90 day Follow-Up

Date of trauma (yyyy/mm/dd): \_\_\_\_\_

Dates and times of attempts: \_\_\_\_\_

Date reached (yyyy/mm/dd): \_\_\_\_\_

Loss to follow-up

**1. I would like to know whether you still have any symptoms from your head trauma?**

No

Yes  which ones :

---



---



---

**2. Do you still have pain related to your accident? If yes, which ones? (if pain was already present before the accident, has it increased since then?)**

Cervical or dorsal pain: No  Yes

Pain in the limbs: No  Yes

Other pain: No  Yes  Specify : \_\_\_\_\_

**3. Since your visit to the emergency department, have you consulted a doctor or specialist because of your condition (for 30 days and 90 days follow-up, ask since the last follow-up)?**

No  Yes

If yes, what kind of consultation?

in Emergency department, planned (follow-up)

in Emergency department, not planned

in a walk-in clinic

in a specialized clinic for concussions

Telephone follow-up with a nurse of the trauma team

with a family physician

with a sport physician

with another physician: \_\_\_\_\_

**(QUESTION 3 CONTINUED OVERLEAF)**

|  |  |  |  |  |  |  |  |  |  |
|--|--|--|--|--|--|--|--|--|--|
|  |  |  |  |  |  |  |  |  |  |
|--|--|--|--|--|--|--|--|--|--|

Center #

Subject #

Initials

in rehabilitation: Physiotherapy and/or Ergotherapy and/or other: \_\_\_\_\_

with a neuropsychologist/ psychologist

another consultation: \_\_\_\_\_

#### 4. What is your principal occupation?

(If patient is a student, please ask if he/she works and check the student AND employed section).

Student

Full-time       Part-time

Were studies continued as before the accident?  Yes  No

If not, what best describes your present studies?

Full-time

Part-time

I no longer study

Employed

Full-time       Part-time

Was the employment continued as before the accident?  Yes  No

If not, what best describes your present work habits?

Full-time

Part-time

Light work / Changes in duties

On a work stoppage

Does not apply

Please explain :

Retired

On holiday

Other : \_\_\_\_\_

Already on work leave before this accident

Unemployed

Maternity leave

Welfare recipient

#### 5. a. Did you return to your normal activities just as before the head trauma?

No  Yes

#### b. If not, is it due to your trauma to the head (vs. physical injuries related to the accident)?

No  Yes

#### c. On what activities other than work did your trauma to the head have an impact?

Sports

Driving

Arts

Activities of daily living (eg, cleaning, cooking, etc.)

Reading

Watch television

Tasks on the computer / mobile devices

Caring for children

Social Activities

Other : \_\_\_\_\_

|  |  |  |  |  |  |  |  |  |  |
|--|--|--|--|--|--|--|--|--|--|
|  |  |  |  |  |  |  |  |  |  |
|--|--|--|--|--|--|--|--|--|--|

Center #

Subject #

Initials

## 6. The Rivermead Post-Concussion Symptoms Questionnaire\*

After a head injury or accident some people experience symptoms which can cause worry or nuisance. We would like to know if you now suffer from any of the symptoms given below. As many of these symptoms occur normally, we would like you to compare yourself now with before the accident. For each one, please circle the number closest to your answer.

- 0 = Not experienced at all
- 1 = No more of a problem
- 2 = A mild problem
- 3 = A moderate problem
- 4 = A severe problem

Compared with before the accident, do you now (i.e., over the last 24 hours) suffer from:

|                                       |   |   |   |   |   |
|---------------------------------------|---|---|---|---|---|
| Headaches.....                        | 0 | 1 | 2 | 3 | 4 |
| Feelings of Dizziness .....           | 0 | 1 | 2 | 3 | 4 |
| Nausea and/or Vomiting .....          | 0 | 1 | 2 | 3 | 4 |
| Noise Sensitivity,                    |   |   |   |   |   |
| easily upset by loud noise .....      | 0 | 1 | 2 | 3 | 4 |
| Sleep Disturbance.....                | 0 | 1 | 2 | 3 | 4 |
| Fatigue, tiring more easily .....     | 0 | 1 | 2 | 3 | 4 |
| Being Irritable, easily angered ..... | 0 | 1 | 2 | 3 | 4 |
| Feeling Depressed or Tearful .....    | 0 | 1 | 2 | 3 | 4 |
| Feeling Frustrated or Impatient ..... | 0 | 1 | 2 | 3 | 4 |
| Forgetfulness, poor memory .....      | 0 | 1 | 2 | 3 | 4 |
| Poor Concentration .....              | 0 | 1 | 2 | 3 | 4 |
| Taking Longer to Think .....          | 0 | 1 | 2 | 3 | 4 |
| Blurred Vision .....                  | 0 | 1 | 2 | 3 | 4 |
| Light Sensitivity,                    |   |   |   |   |   |
| Easily upset by bright light.....     | 0 | 1 | 2 | 3 | 4 |
| Double Vision .....                   | 0 | 1 | 2 | 3 | 4 |
| Restlessness .....                    | 0 | 1 | 2 | 3 | 4 |

Are you experiencing any other difficulties?

1. \_\_\_\_\_ 0 1 2 3 4
2. \_\_\_\_\_ 0 1 2 3 4

\*King, N., Crawford, S., Wenden, F., Moss, N., and Wade, D. (1995) J. Neurology 242: 587-592

Total \_\_\_\_\_  
Average \_\_\_\_\_
