# Supplementary material for: Post-Concussion Symptoms Rule: Derivation and Validation of a Clinical Decision Rule for Early Prediction of Persistent Symptoms after a Mild Traumatic Brain Injury
Source: PubMed Central journal article supplement — J Neurotrauma. 2022 Sep 29;39(19-20):1349–62. doi: 10.1089/neu.2022.0026 (PMC9529302; doi:10.1089/neu.2022.0026), 2022-09-29
Supplement: Suppl_FileS3.pdf [file Suppl_FileS3.pdf]

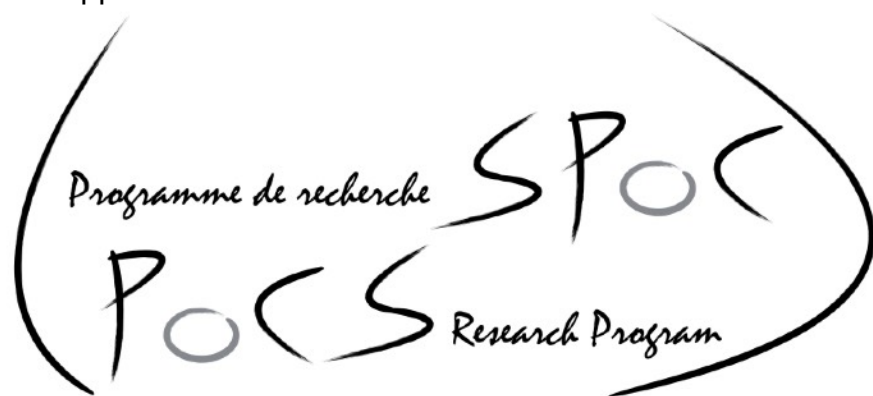

|  |  |  |  |  |  |  |  |  |  |
|--|--|--|--|--|--|--|--|--|--|
|  |  |  |  |  |  |  |  |  |  |
|--|--|--|--|--|--|--|--|--|--|

#Centre

Subject #

Initials

### Validation PoCS Rule

**Additional Questionnaire**

Date of trauma (yyyy/mm/dd): \_\_\_\_\_

Dates and hours of attempts:

---



---

Date reached (yyyy/mm/dd): \_\_\_\_\_

Lost to Follow-Up

Questionnaire completed at:

- 7 day Follow-Up
- 30 day Follow-Up
- 90 day Follow-Up

|  |  |  |  |  |  |  |  |  |
|--|--|--|--|--|--|--|--|--|
|  |  |  |  |  |  |  |  |  |
|--|--|--|--|--|--|--|--|--|

#Centre

Subject #

Initials

**Details of the accident :****1. Type of impact:**A.  Car :

Has there been a collision?

No Yes  : frontal impactUnknown  side impact rear impact multiple impacts

With what did the collision occur?

 car object (wall, tree, rock...) motorcycle moose bicycle other animal pedestrian other, specify \_\_\_\_\_

Did the vehicle flip or rollover?

No Yes Unknown 

Did it leave the road?

No Yes Unknown 

Were you ejected?

No Yes Unknown  other, specify \_\_\_\_\_B.  Other motorized vehicle: Motorcycle  All-Terrain Vehicle  Snowmobile  Other, specify : \_\_\_\_\_

Has there been a collision?

No Yes  : carUnknown  motorcycle bicycle pedestrian object (wall, tree, rock...) moose other animal other, specify \_\_\_\_\_

Did it leave the road?

No Yes Unknown 

Were you ejected?

No Yes Unknown 

Was there a fall without a collision, loss of control or an uneven road surface?

No Yes Unknown  other, specify \_\_\_\_\_

|  |  |  |  |  |  |  |  |  |  |
|--|--|--|--|--|--|--|--|--|--|
|  |  |  |  |  |  |  |  |  |  |
|--|--|--|--|--|--|--|--|--|--|

#Centre

Subject #

Initials

C.  Bicycle :

Has there been a collision?

No Yes  : carUnknown  motorcycle bicycle pedestrian object (wall, tree, rock...) moose other animal other, specify \_\_\_\_\_

Were you ejected?

No Yes Unknown 

Was there a fall without a collision, loss of control or an uneven road surface?

No Yes Unknown  autre, précisez \_\_\_\_\_D.  Pedestrian :

Were you stuck by a vehicle?

No Yes  carUnknown  motorcycle bicycle other, specify \_\_\_\_\_

Was there a fall?

No Yes  from his heightUnknown  from a height of \_\_\_ metres \*

\*(1 metre = 3 feet or 5 steps)

E.  Sport : hockey football/rugby soccer baseball rollerblading skiing/snowboarding ice skating sliding horseback riding skateboarding cheerleading other, specify \_\_\_\_\_

|  |  |  |  |  |  |  |  |  |  |
|--|--|--|--|--|--|--|--|--|--|
|  |  |  |  |  |  |  |  |  |  |
|--|--|--|--|--|--|--|--|--|--|

#Centre

Subject #

Initials

F.  Work accident :

Could the accident best meet class sections A to E?

No

Yes

Have you received an object on the head?

No

Yes

Unknown

Have you been caught between two structures?

No

Yes

Unknown

other, specify \_\_\_\_\_

\_\_\_\_\_

G.  Blows, battle and altercation:

Was there a fight, or was the person hit?

No

Yes

Unknown

other, specify \_\_\_\_\_

\_\_\_\_\_

H.  Other type of impact/ Not mentioned

Specify : \_\_\_\_\_

\_\_\_\_\_

\_\_\_\_\_

|  |  |  |  |  |  |  |  |  |
|--|--|--|--|--|--|--|--|--|
|  |  |  |  |  |  |  |  |  |
|--|--|--|--|--|--|--|--|--|

#Centre

Subject #

Initials

**2. Did you suffer any head injuries?**

No

Yes

|                                     |                             |                              |
|-------------------------------------|-----------------------------|------------------------------|
| Wounds/contusions to the head :     | No <input type="checkbox"/> | Yes <input type="checkbox"/> |
| Wounds/contusions to the face :     | No <input type="checkbox"/> | Yes <input type="checkbox"/> |
| Fracture to the skull :             | No <input type="checkbox"/> | Yes <input type="checkbox"/> |
| Fracture to the base of the skull : | No <input type="checkbox"/> | Yes <input type="checkbox"/> |
| Fracture to the face :              | No <input type="checkbox"/> | Yes <input type="checkbox"/> |

other, specify \_\_\_\_\_

**3. Did you suffer any other injuries?**

No

Yes

Fractures→

|                                               |
|-----------------------------------------------|
| <input type="checkbox"/> Upper spine          |
| <input type="checkbox"/> Lower spine          |
| <input type="checkbox"/> Ribs                 |
| <input type="checkbox"/> Upper limbs          |
| <input type="checkbox"/> Lower limbs          |
| <input type="checkbox"/> Pelvis               |
| <input type="checkbox"/> Other, specify _____ |

Sprain/traumatic tendinitis→

|                                      |                                   |
|--------------------------------------|-----------------------------------|
| <input type="checkbox"/> Upper spine |                                   |
| <input type="checkbox"/> Lower spine |                                   |
| <input type="checkbox"/> Upper limbs | : <input type="checkbox"/> Wrist  |
|                                      | <input type="checkbox"/> Elbow    |
|                                      | <input type="checkbox"/> Shoulder |
|                                      | <input type="checkbox"/> Other    |
| <input type="checkbox"/> Lower limbs | : <input type="checkbox"/> Ankle  |
|                                      | <input type="checkbox"/> Knee     |
|                                      | <input type="checkbox"/> Other    |

Other, specify \_\_\_\_\_

Wounds/contusions/hematomas

|                                      |                                   |
|--------------------------------------|-----------------------------------|
| <input type="checkbox"/> Back        |                                   |
| <input type="checkbox"/> Abdomen     |                                   |
| <input type="checkbox"/> Upper limbs | : <input type="checkbox"/> Wrist  |
|                                      | <input type="checkbox"/> Elbow    |
|                                      | <input type="checkbox"/> Shoulder |
|                                      | <input type="checkbox"/> Other    |
| <input type="checkbox"/> Lower limbs | : <input type="checkbox"/> Ankle  |
|                                      | <input type="checkbox"/> Knee     |
|                                      | <input type="checkbox"/> Hip      |
|                                      | <input type="checkbox"/> Other    |

Other, specify \_\_\_\_\_

|  |  |  |  |  |  |  |  |
|--|--|--|--|--|--|--|--|
|  |  |  |  |  |  |  |  |
|--|--|--|--|--|--|--|--|

#Centre

Subject #

Initials

**4. Was there any other person injured or deceased in the accident? Specify.**

- None
- Spouse
- Children(s)
- Parent(s)
- Friend(s)
- Person in the other vehicle
- Unknown
- Other: \_\_\_\_\_

**5. Were there any material losses caused by the accident (e.g. total loss of vehicle, etc.)? Specify :**

- None
- Car
- Motorcycle
- Bicycle
- Other

**6. In everyday life, do you have family support?**

No       Yes

**7. Medical history:**

**For the next questions, please answer yes or no:**

**A) Do you have a medical history?**                              No                               Yes

If Yes, were you hospitalized within the last year?    No                               Yes

**B) Do you have a history of head surgeries?**    No                               Yes

If Yes, were you hospitalized within the last year?    No                               Yes

**C) Do you have any psychiatric history?**                              No                               Yes

If Yes, were you hospitalized within the last year?    No                               Yes

If Yes, which one(s)?

- Depression
- Manic Depressive Psychosis disorder (bipolar)
- Schizophrenia
- Personality disorder
- General anxiety disorder
- Hyperactivity
- Other \_\_\_\_\_

|  |  |  |  |  |  |  |  |  |  |
|--|--|--|--|--|--|--|--|--|--|
|  |  |  |  |  |  |  |  |  |  |
|--|--|--|--|--|--|--|--|--|--|

#Centre

Subject #

Initials

8. **Do you take any medication prescribed by a doctor?** Which one(s)? For what reason(s)?

No  Yes

**If Yes :**

A) Antidepressants : \_\_\_\_\_

B) Mood stabilisers : \_\_\_\_\_

C) Anxiolytics: \_\_\_\_\_

D) Antipsychotics : \_\_\_\_\_

E) Analgesics :  Acute pain \_\_\_\_\_

Chronic pain ( $\geq 3$  months) \_\_\_\_\_

F) Other : \_\_\_\_\_

9. **How would you describe your alcohol consumption before the accident, in everyday life?**

- None
- Occasional
- Moderate (< 2 consumptions per day)
- Major ( $\geq 2$  consumptions per day)
- The habit interferes with my work/social function

10. **How would you describe your drug use before the accident, in everyday life?**

- None
- Occasional
- Moderate (each month)
- Major (each week)
- The habit interferes with my work/social function

11. **Have you had any academic difficulties** (since elementary school) (e.g. repeated a grade, learning difficulties, hyperactivity, attention disorder, special classes, tutoring, reading/math/writing difficulties)?

No  Yes

If Yes, specify: \_\_\_\_\_

\_\_\_\_\_

|  |  |  |  |  |  |  |  |  |  |
|--|--|--|--|--|--|--|--|--|--|
|  |  |  |  |  |  |  |  |  |  |
|--|--|--|--|--|--|--|--|--|--|

#Centre

Subject #

Initials

**12. What is your level of education? (completed)**

- |                                                         |                                                                  |
|---------------------------------------------------------|------------------------------------------------------------------|
| <input type="checkbox"/> Elementary                     | <input type="checkbox"/> Collegial Education Certificate         |
| <input type="checkbox"/> Secondary 1                    | <input type="checkbox"/> Collegial Education Diploma             |
| <input type="checkbox"/> Secondary 2                    | <input type="checkbox"/> Undergraduate certificate (First cycle) |
| <input type="checkbox"/> Secondary 3                    | <input type="checkbox"/> Baccalaureate                           |
| <input type="checkbox"/> Secondary 4                    | <input type="checkbox"/> Masters                                 |
| <input type="checkbox"/> Secondary 5                    | <input type="checkbox"/> First year Doctorate                    |
| <input type="checkbox"/> Professional Education Diploma | <input type="checkbox"/> Doctorate (PhD)                         |

**13. What is your current work?**

A) Employment status:

- Employed
- Executive
- Self-employed
- Seasonal worker
- Not working

B) Length of employment:

- < 1 year
- 1 to 2 years
- 2 to 5 years
- 5 to 7 years
- 7 to 10 years
- 10 to 15 years
- > 15 years

C) Occupation (primarily):

- Office
- Sitting (transportation)
- Standing
- Physical labour
- Education
- Health-daycare
- Catering
- Other: \_\_\_\_\_

**14. Have you experienced any stressful situation in the 12 months preceding the accident (stressors)?**

No       Yes



|  |  |  |  |  |  |  |  |  |
|--|--|--|--|--|--|--|--|--|
|  |  |  |  |  |  |  |  |  |
|--|--|--|--|--|--|--|--|--|

#Centre

Subject #

Initials

15. Did you suffer any head injuries in the past (or a concussion)?

No

Yes

If Yes :

A) Specify how many : \_\_\_\_\_

***If there were more than one, specify the type for each head injury, starting with the most recent to the oldest. If there were more than three, indicate for the last three only:***

1A. The type of trauma :

- Head trauma without any brain injury
- mild Traumatic Brain Injury (TBI) (with loss of consciousness, amnesia, confusion or CT scan abnormalities)
- moderate TBI (hospitalized, non-intubated nor Intensive Care Unit)
- severe TBI (intubated, Intensive Care Unit)
- Unknown

1B. Specify the exact year of TBI. If less than one year, specify the exact month :  
\_\_\_\_\_

2A. The type of trauma :

- Head trauma without any brain injury
- mild Traumatic Brain Injury (TBI) (with loss of consciousness, amnesia, confusion or CT scan abnormalities)
- moderate TBI (hospitalized, non-intubated nor Intensive Care Unit)
- severe TBI (intubated, Intensive Care Unit)
- Unknown

2B. Specify the exact year of TBI. If less than one year, specify the exact month :  
\_\_\_\_\_

3A. The type of trauma :

- Head trauma without any brain injury
- mild Traumatic Brain Injury (TBI) (with loss of consciousness, amnesia, confusion or CT scan abnormalities)
- moderate TBI (hospitalized, non-intubated nor Intensive Care Unit)
- severe TBI (intubated, Intensive Care Unit)
- Unknown

3B. Specify the exact year of TBI. If less than one year, specify the exact month :  
\_\_\_\_\_
