# Supplementary material for: Post-Concussion Symptoms Rule: Derivation and Validation of a Clinical Decision Rule for Early Prediction of Persistent Symptoms after a Mild Traumatic Brain Injury
Source: PubMed Central journal article supplement — J Neurotrauma. 2022 Sep 29;39(19-20):1349–62. doi: 10.1089/neu.2022.0026 (PMC9529302; doi:10.1089/neu.2022.0026), 2022-09-29
Supplement: Suppl_FileS4.pdf [file Suppl_FileS4.pdf]

**Online supplemental file 4. Prediction model specifications and coefficients**

| <i>Variable</i>                   | <i>B</i> | <i>SE</i> | <i>Odds Ratio</i> | <i>95% CI§</i> | <i>Points</i> |
|-----------------------------------|----------|-----------|-------------------|----------------|---------------|
| <b>ED assessment*</b>             |          |           |                   |                |               |
| Age 25-34                         | 0.74     | 0.43      | 2.09              | 0.90-4.84      | 1             |
| Age 35-44                         | 1.38     | 0.44      | 4.00              | 1.68-9.52      | 3             |
| Age 45-54                         | 0.96     | 0.42      | 3.00              | 1.13-6.00      | 2             |
| Age 55-64                         | 1.13     | 0.42      | 3.10              | 1.35-7.12      | 2             |
| Sex (F)                           | 0.66     | 0.29      | 1.95              | 1.10-3.44      | 1             |
| Prior TBI < 1 year                | 0.90     | 0.52      | 2.47              | 0.88-6.95      | 2             |
| Prior multiple TBI                | 0.77     | 0.41      | 2.16              | 0.97-4.83      | 1             |
| History of mental health disorder | 0.60     | 0.30      | 1.83              | 1.01-3.29      | 1             |
| Headache in ED                    | 0.53     | 0.34      | 1.69              | 0.87-3.28      | 1             |
| Cervical Sprain                   | 0.82     | 0.29      | 2.26              | 1.27-4.01      | 2             |
| Hemorrhage on CT                  | 1.08     | 0.50      | 2.94              | 1.09-7.94      | 2             |
| <b>Follow-up assessment**</b>     |          |           |                   |                |               |
| Headache                          | 0.74     | 0.51      | 3.14              | 1.27-7.76      | 2             |
| Sleep disturbance                 | 1.14     | 0.46      | 1.74              | 0.83-3.66      | 1             |
| Fatigue                           | 0.55     | 0.38      | 2.09              | 0.76-5.74      | 1             |
| Light sensitivity                 | 0.98     | 0.37      | 2.67              | 1.29-5.53      | 2             |
| Rivermead score $\geq$ 21         | 1.17     | 0.41      | 3.24              | 1.45-7.24      | 2             |

§ 95% Confidence Interval

\*These coefficients only include ED predictors

\*\*Only applies to the "moderate risk" group identified in the ED (score 2-6)
