# Supplementary material for: Post-Concussion Symptoms Rule: Derivation and Validation of a Clinical Decision Rule for Early Prediction of Persistent Symptoms after a Mild Traumatic Brain Injury
Source: PubMed Central journal article supplement — J Neurotrauma. 2022 Sep 29;39(19-20):1349–62. doi: 10.1089/neu.2022.0026 (PMC9529302; doi:10.1089/neu.2022.0026), 2022-09-29
Supplement: Suppl_FileS5.pdf [file Suppl_FileS5.pdf]

**Online supplemental file 5. Proportion of patients with PPCS for all *PoCS Rule* clinical predictors**

| <i>Variable</i>                   | <i>Derivation cohort</i> |                        | <i>Validation cohort</i> |                        |
|-----------------------------------|--------------------------|------------------------|--------------------------|------------------------|
|                                   | <i>n</i>                 | <i>n with PPCS (%)</i> | <i>n</i>                 | <i>n with PPCS (%)</i> |
| <b>ED assessment</b>              |                          |                        |                          |                        |
| Age 25-34                         | 81                       | 14 (17.3)              | 95                       | 16 (16.8)              |
| Age 35-44                         | 49                       | 13 (26.5)              | 73                       | 17 (23.3)              |
| Age 45-54                         | 67                       | 14 (20.9)              | 89                       | 19 (21.4)              |
| Age 55-64                         | 76                       | 14 (18.4)              | 81                       | 19 (23.5)              |
| Sex (F)                           | 165                      | 35 (21.2)              | 266                      | 63 (23.7)              |
| Prior TBI < 1 year                | 51                       | 8 (33.8)               | 71                       | 5 (13.9)               |
| Prior multiple TBI                | 24                       | 13 (25.3)              | 36                       | 14 (19.7)              |
| History of mental health disorder | 132                      | 30 (22.7)              | 126                      | 33 (26.2)              |
| Headache in ED                    | 313                      | 56 (17.9)              | 433                      | 73 (16.9)              |
| Cervical Sprain                   | 153                      | 36 (23.6)              | 158                      | 35 (22.2)              |
| Hemorrhage on CT                  | 31                       | 7 (22.6)               | 46                       | 6 (13.0)               |
| <b>Follow-up assessment†</b>      |                          |                        |                          |                        |
| Headache                          | 215                      | 58 (26.9)              | 353                      | 86 (24.4)              |
| Sleep disturbance                 | 133                      | 39 (29.3)              | 175                      | 47 (26.9)              |
| Fatigue                           | 262                      | 60 (22.9)              | 404                      | 86 (21.3)              |
| Light sensitivity                 | 98                       | 39 (39.8)              | 207                      | 55 (26.6)              |
| Rivermead score $\geq$ 21         | 91                       | 43 (47.3)              | 154                      | 60 (39.0)              |

†*n* = 447 and 600 for the derivation and validation cohorts, respectively
