# Supplementary material for: Post-Concussion Symptoms Rule: Derivation and Validation of a Clinical Decision Rule for Early Prediction of Persistent Symptoms after a Mild Traumatic Brain Injury
Source: PubMed Central journal article supplement — J Neurotrauma. 2022 Sep 29;39(19-20):1349–62. doi: 10.1089/neu.2022.0026 (PMC9529302; doi:10.1089/neu.2022.0026), 2022-09-29
Supplement: Suppl_FileS6.pdf [file Suppl_FileS6.pdf]

**Online supplemental file 6. Classification performance for each step of the model (derivation cohort)**

---

**Step 1: Evaluation in ED**

| <i>Threshold</i> | <i>Sensitivity</i> | <i>Specificity</i> | <i>Positive Predictive Value</i> | <i>Negative Predictive Value</i> |
|------------------|--------------------|--------------------|----------------------------------|----------------------------------|
| $\geq 1$         | 1.00               | 0.04               | 0.16                             | 1.00                             |
| $\geq 2$         | 0.96               | 0.22               | 0.18                             | 0.97                             |
| $\geq 3$         | 0.90               | 0.41               | 0.21                             | 0.96                             |
| $\geq 4$         | 0.74               | 0.60               | 0.25                             | 0.93                             |
| $\geq 5$         | 0.60               | 0.78               | 0.33                             | 0.92                             |
| $\geq 6$         | 0.39               | 0.89               | 0.38                             | 0.98                             |
| $\geq 7$         | 0.19               | 0.95               | 0.41                             | 0.87                             |
| $\geq 8$         | 0.07               | 0.99               | 0.70                             | 0.86                             |

---

---

**Step 2: Follow-up evaluation seven days after trauma**

| <i>Threshold</i> | <i>Sensitivity</i> | <i>Specificity</i> | <i>Positive Predictive Value</i> | <i>Negative Predictive Value</i> |
|------------------|--------------------|--------------------|----------------------------------|----------------------------------|
| $\geq 1$         | 0.98               | 0.29               | 0.21                             | 0.99                             |
| $\geq 2$         | 0.94               | 0.42               | 0.24                             | 0.97                             |
| $\geq 3$         | 0.89               | 0.61               | 0.30                             | 0.97                             |
| $\geq 4$         | 0.81               | 0.78               | 0.42                             | 0.96                             |
| $\geq 5$         | 0.68               | 0.83               | 0.44                             | 0.93                             |
| $\geq 6$         | 0.56               | 0.89               | 0.50                             | 0.91                             |
| $\geq 7$         | 0.38               | 0.95               | 0.60                             | 0.89                             |
| $\geq 8$         | 0.28               | 0.97               | 0.67                             | 0.87                             |

---
