# Supplementary material for: Post-Concussion Symptoms Rule: Derivation and Validation of a Clinical Decision Rule for Early Prediction of Persistent Symptoms after a Mild Traumatic Brain Injury
Source: PubMed Central journal article supplement — J Neurotrauma. 2022 Sep 29;39(19-20):1349–62. doi: 10.1089/neu.2022.0026 (PMC9529302; doi:10.1089/neu.2022.0026), 2022-09-29
Supplement: Suppl_FileS7-S10.pdf [file Suppl_FileS7-S10.pdf]

**Online supplemental file 7. Characteristics of the population lost to follow-up for the derivation cohort: ED evaluation**

| Characteristics                             | Enrolled patients<br>n=563 |         | Derivation cohort<br>n=471 |         | Lost to follow-up<br>n=92 |         |
|---------------------------------------------|----------------------------|---------|----------------------------|---------|---------------------------|---------|
|                                             | n                          | (%)     | n                          | (%)     | n                         | (%)     |
| <b>Sociodemographic variables</b>           |                            |         |                            |         |                           |         |
| Age, median (Q1-Q3)                         | 37                         | (22-55) | 37                         | (23-57) | 36                        | (21-51) |
| 14-24                                       | 172                        | (30.6)  | 142                        | (30.1)  | 30                        | (32.6)  |
| 25-34                                       | 97                         | (17.2)  | 81                         | (17.2)  | 16                        | (17.4)  |
| 35-44                                       | 63                         | (11.2)  | 49                         | (10.4)  | 14                        | (15.2)  |
| 45-54                                       | 86                         | (15.3)  | 67                         | (14.2)  | 19                        | (20.7)  |
| 55-64                                       | 83                         | (14.7)  | 76                         | (16.1)  | 7                         | (7.6)   |
| 65-74                                       | 45                         | (8.0)   | 39                         | (8.3)   | 6                         | (6.5)   |
| 75-84                                       | 15                         | (2.7)   | 15                         | (3.2)   | 0                         | (0.0)   |
| 85+                                         | 2                          | (0.4)   | 2                          | (0.4)   | 0                         | (0.0)   |
| Sex (M)                                     | 369                        | (65.4)  | 306                        | (65.0)  | 63                        | (68.5)  |
| <b>Past medical/injury history</b>          |                            |         |                            |         |                           |         |
| History of TBI                              | 201                        | (36.0)  | 166                        | (35.4)  | 35                        | (38.9)  |
| Prior TBI < 1 year                          | 30                         | (5.8)   | 23                         | (5.0)   | 7                         | (12.7)  |
| Prior multiple TBI                          | 60                         | (11.7)  | 49                         | (10.7)  | 11                        | (20.4)  |
| Prior moderate / severe TBI                 | 22                         | (4.6)   | 19                         | (4.5)   | 3                         | (6.1)   |
| History of mental health disorder†          | 146                        | (26.1)  | 131                        | (28.0)  | 15                        | (16.5)  |
| At least 3 different prescribed medications | 114                        | (22.0)  | 104                        | (22.4)  | 10                        | (18.5)  |
| <b>Evaluation in ED</b>                     |                            |         |                            |         |                           |         |
| Mechanism of injury                         |                            |         |                            |         |                           |         |
| Sport                                       | 120                        | (23.1)  | 109                        | (23.5)  | 11                        | (20.0)  |
| Fall from their own height                  | 105                        | (20.2)  | 97                         | (20.9)  | 8                         | (14.6)  |
| Motor vehicle accident                      | 87                         | (16.8)  | 76                         | (16.4)  | 11                        | (20.0)  |
| Bicycle accident                            | 81                         | (15.6)  | 73                         | (15.7)  | 8                         | (14.6)  |
| Fall more than own height                   | 41                         | (7.9)   | 34                         | (7.3)   | 7                         | (12.7)  |
| Others                                      | 85                         | (16.4)  | 75                         | (16.2)  | 10                        | (18.2)  |
| Loss of consciousness                       |                            |         |                            |         |                           |         |
| Unknown duration                            | 274                        | (49.0)  | 228                        | (48.7)  | 46                        | (50.5)  |
| < 5 minutes                                 | 97                         | (17.4)  | 78                         | (38.5)  | 19                        | (20.9)  |
| ≥ 5 minutes                                 | 144                        | (25.8)  | 124                        | (26.5)  | 20                        | (22.0)  |
| ≥ 5 minutes                                 | 33                         | (5.9)   | 26                         | (5.6)   | 7                         | (7.7)   |
| Unknown information                         | 139                        | (24.9)  | 115                        | (24.6)  | 24                        | 26.4    |
| Documented post-traumatic amnesia           |                            |         |                            |         |                           |         |
| < 30 minutes                                | 220                        | (39.1)  | 189                        | (40.1)  | 31                        | (33.7)  |
| ≥ 30 minutes and < 3 hours                  | 43                         | (7.6)   | 37                         | (7.9)   | 6                         | (6.5)   |
| ≥ 3 hours                                   | 14                         | (2.5)   | 12                         | (2.5)   | 2                         | (2.2)   |
| Post-traumatic confusion                    | 312                        | (57.7)  | 261                        | (57.9)  | 51                        | (56.7)  |
| Documented headache in ED‡                  |                            |         |                            |         |                           |         |
| < 3                                         | 201                        | (35.7)  | 166                        | (35.2)  | 35                        | (38.0)  |
| 4-7                                         | 121                        | (21.5)  | 104                        | (22.1)  | 17                        | (18.5)  |
| 8-10                                        | 59                         | (10.5)  | 43                         | (9.1)   | 16                        | (17.4)  |
| GCS* at ED arrival                          |                            |         |                            |         |                           |         |
| 15                                          | 484                        | (86.0)  | 409                        | (86.8)  | 75                        | (81.5)  |
| 14                                          | 73                         | (13.0)  | 56                         | (11.9)  | 17                        | (18.5)  |
| 13                                          | 6                          | (1.0)   | 6                          | (1.3)   | 0                         | (0.0)   |
| Concomitant injuries                        |                            |         |                            |         |                           |         |
| Cervical sprain                             | 316                        | (61.1)  | 278                        | (60.2)  | 38                        | (69.1)  |
| Haemorrhage on CT                           | 155                        | (31.8)  | 130                        | (31.9)  | 25                        | (31.6)  |
| Haemorrhage on CT                           | 43                         | (7.7)   | 31                         | (6.6)   | 12                        | (13.2)  |

† Any pre-injury mental health disorder, including depression, anxiety, bipolar disorder, schizophrenia, attention-deficit/hyperactivity disorder (ADHD), personality disorders, obsessive-compulsive disorder, post-traumatic stress disorder (PTSD), and other psychiatric disorders.

‡ Verbal rating scale, 0-10 \* Glasgow Coma Scale

**Online supplemental file 8. Characteristics of the population lost to follow-up for the validation cohort: ED evaluation**

| <i>Characteristics</i>                      | <i>Enrolled patients<br/>n=770</i> |            | <i>Validation cohort<br/>n=612</i> |            | <i>Lost to follow-up<br/>n=158</i> |            |
|---------------------------------------------|------------------------------------|------------|------------------------------------|------------|------------------------------------|------------|
|                                             | <i>n</i>                           | <i>(%)</i> | <i>n</i>                           | <i>(%)</i> | <i>n</i>                           | <i>(%)</i> |
| <b>Sociodemographic variables</b>           |                                    |            |                                    |            |                                    |            |
| Age, median (Q1-Q3)                         | 41                                 | (24-59)    | 43                                 | (25-60)    | 37                                 | (23-52)    |
| 14-24                                       | 198                                | (25.7)     | 151                                | (24.7)     | 47                                 | (29.7)     |
| 25-34                                       | 124                                | (16.1)     | 95                                 | (15.5)     | 29                                 | (18.4)     |
| 35-44                                       | 98                                 | (12.7)     | 73                                 | (11.9)     | 25                                 | (15.8)     |
| 45-54                                       | 110                                | (14.3)     | 89                                 | (14.5)     | 21                                 | (13.3)     |
| 55-64                                       | 103                                | (13.4)     | 81                                 | (13.2)     | 22                                 | (13.9)     |
| 65-74                                       | 82                                 | (10.7)     | 77                                 | (12.6)     | 5                                  | (3.2)      |
| 75-84                                       | 38                                 | (4.9)      | 32                                 | (5.2)      | 6                                  | (3.8)      |
| 85+                                         | 17                                 | (2.2)      | 14                                 | (2.3)      | 3                                  | (1.9)      |
| Sex (M)                                     | 446                                | (57.9)     | 346                                | (56.5)     | 100                                | (63.3)     |
| <b>Past medical/injury history</b>          |                                    |            |                                    |            |                                    |            |
| History of TBI                              | 306                                | (40.1)     | 249                                | (40.7)     | 57                                 | (37.7)     |
| Prior TBI < 1 year                          | 45                                 | (6.4)      | 36                                 | (5.9)      | 9                                  | (10.0)     |
| Prior multiple TBI                          | 88                                 | (12.5)     | 71                                 | (11.6)     | 17                                 | (18.9)     |
| Prior moderate / severe TBI                 | 42                                 | (6.2)      | 38                                 | (6.4)      | 4                                  | (4.5)      |
| History of mental health disorder†          | 150                                | (21.3)     | 126                                | (20.6)     | 24                                 | (26.4)     |
| At least 3 different prescribed medications | 157                                | (22.3)     | 136                                | (22.2)     | 21                                 | (23.1)     |
| <b>Evaluation in ED</b>                     |                                    |            |                                    |            |                                    |            |
| Mechanism of injury                         |                                    |            |                                    |            |                                    |            |
| Sport                                       | 114                                | (16.2)     | 101                                | (16.5)     | 13                                 | (14.3)     |
| Fall from their own height                  | 132                                | (18.8)     | 114                                | (18.6)     | 18                                 | (19.8)     |
| Motor vehicle accident                      | 101                                | (14.4)     | 87                                 | (14.2)     | 14                                 | (15.4)     |
| Bicycle accident                            | 88                                 | (12.5)     | 76                                 | (12.4)     | 12                                 | (13.2)     |
| Fall more than own height                   | 53                                 | (7.5)      | 46                                 | (7.5)      | 7                                  | (7.7)      |
| Others                                      | 215                                | (30.6)     | 188                                | (30.7)     | 27                                 | (29.7)     |
| Documented Loss of consciousness            |                                    |            |                                    |            |                                    |            |
| Unknown duration                            | 366                                | (47.6)     | 289                                | (47.3)     | 77                                 | (49.0)     |
| < 5 minutes                                 | 142                                | (18.5)     | 111                                | (18.2)     | 31                                 | (19.7)     |
| ≥ 5 minutes                                 | 187                                | (24.4)     | 150                                | (24.6)     | 37                                 | (23.6)     |
| Unknown information                         | 37                                 | (4.8)      | 28                                 | (4.6)      | 9                                  | (5.7)      |
| Documented post-traumatic amnesia           |                                    |            |                                    |            |                                    |            |
| < 30 minutes                                | 127                                | (16.5)     | 100                                | (16.4)     | 27                                 | (17.2)     |
| ≥ 30 minutes and < 3 hours                  | 212                                | (27.8)     | 167                                | (27.6)     | 45                                 | (28.5)     |
| ≥ 3 hours                                   | 51                                 | (6.7)      | 47                                 | (7.8)      | 4                                  | (2.5)      |
| ≥ 3 hours                                   | 14                                 | (1.8)      | 11                                 | (1.8)      | 3                                  | (1.9)      |
| Post-traumatic confusion                    | 402                                | (53.2)     | 320                                | (53.2)     | 82                                 | (52.9)     |
| Documented headache in ED‡                  |                                    |            |                                    |            |                                    |            |
| < 3                                         | 199                                | (25.8)     | 154                                | (25.2)     | 45                                 | (28.5)     |
| 4-7                                         | 252                                | (32.7)     | 202                                | (33.0)     | 50                                 | (31.7)     |
| 8-10                                        | 99                                 | (12.9)     | 77                                 | (12.6)     | 22                                 | (13.9)     |
| Glasgow Coma Scale score at ED arrival      |                                    |            |                                    |            |                                    |            |
| 15                                          | 681                                | (88.4)     | 545                                | (89.1)     | 136                                | (86.1)     |
| 14                                          | 80                                 | (10.4)     | 61                                 | (10.0)     | 19                                 | (12.0)     |
| 13                                          | 9                                  | (1.2)      | 6                                  | (1.0)      | 3                                  | (1.9)      |
| Concomitant injuries                        |                                    |            |                                    |            |                                    |            |
| Cervical sprain                             | 430                                | (61.2)     | 374                                | (61.1)     | 56                                 | (61.5)     |
| Haemorrhage on CT                           | 197                                | (26.9)     | 158                                | (25.8)     | 39                                 | (32.5)     |
| Haemorrhage on CT                           | 54                                 | (7.0)      | 46                                 | (7.5)      | 8                                  | (5.1)      |

† Any pre-injury mental health disorder, including depression, anxiety, bipolar disorder, schizophrenia, attention-deficit/hyperactivity disorder (ADHD), personality disorders, obsessive-compulsive disorder, post-traumatic stress disorder (PTSD), and other psychiatric disorders.

‡ Verbal rating scale, 0-10

**Online supplemental file 9. Characteristics of the population lost to follow-up for the derivation cohort:  
assessment of patients at 7-days follow-up evaluation**

| <i>Rivermead Post-concussion Questionnaire items</i> | <i>Enrolled patients<br/>n=489</i> |            | <i>Derivation cohort<br/>n=447</i> |            | <i>Lost to follow-up<br/>n=42</i> |            |
|------------------------------------------------------|------------------------------------|------------|------------------------------------|------------|-----------------------------------|------------|
|                                                      | <i>n</i>                           | <i>(%)</i> | <i>n</i>                           | <i>(%)</i> | <i>n</i>                          | <i>(%)</i> |
| <i>At least 2 points</i>                             |                                    |            |                                    |            |                                   |            |
| Headaches                                            | 245                                | (50.1)     | 215                                | (48.1)     | 30                                | (71.4)     |
| Feelings of Dizziness                                | 181                                | (37.0)     | 158                                | (35.3)     | 23                                | (54.8)     |
| Nausea and/or Vomiting                               | 66                                 | (13.5)     | 54                                 | (12.1)     | 12                                | (28.6)     |
| Noise Sensitivity, easily upset by loud noise        | 130                                | (26.6)     | 113                                | (25.3)     | 17                                | (40.5)     |
| Sleep Disturbance                                    | 154                                | (31.5)     | 133                                | (29.8)     | 21                                | (50.0)     |
| Fatigue, tiring more easily                          | 294                                | (60.1)     | 262                                | (58.6)     | 32                                | (76.2)     |
| Being Irritable, easily angered                      | 139                                | (28.4)     | 124                                | (27.7)     | 15                                | (35.7)     |
| Feeling Depressed or Tearful                         | 113                                | (23.1)     | 98                                 | (21.9)     | 15                                | (35.7)     |
| Feeling Frustrated or Impatient                      | 154                                | (31.5)     | 133                                | (29.8)     | 21                                | (50.0)     |
| Forgetfulness, poor memory                           | 182                                | (37.2)     | 155                                | (34.7)     | 27                                | (64.3)     |
| Poor Concentration                                   | 192                                | (39.3)     | 172                                | (38.5)     | 20                                | (47.6)     |
| Taking Longer to Think                               | 181                                | (37.0)     | 156                                | (34.9)     | 25                                | (59.5)     |
| Blurred Vision                                       | 78                                 | (16.0)     | 68                                 | (15.2)     | 10                                | (23.8)     |
| Light Sensitivity, easily upset by bright light      | 112                                | (22.9)     | 98                                 | (21.9)     | 14                                | (33.3)     |
| Double Vision                                        | 22                                 | (4.5)      | 18                                 | (4.0)      | 4                                 | (9.5)      |
| Restlessness                                         | 47                                 | (9.6)      | 42                                 | (9.4)      | 5                                 | (11.9)     |
| <i>At least 3 points</i>                             |                                    |            |                                    |            |                                   |            |
| Headaches                                            | 133                                | (27.2)     | 110                                | (24.6)     | 23                                | (54.8)     |
| Feelings of Dizziness                                | 80                                 | (16.4)     | 70                                 | (15.7)     | 10                                | (23.8)     |
| Nausea and/or Vomiting                               | 20                                 | (4.1)      | 15                                 | (3.4)      | 5                                 | (11.9)     |
| Noise Sensitivity, easily upset by loud noise        | 69                                 | (14.1)     | 57                                 | (12.8)     | 12                                | (28.6)     |
| Sleep Disturbance                                    | 91                                 | (18.6)     | 73                                 | (16.3)     | 18                                | (42.9)     |
| Fatigue, tiring more easily                          | 178                                | (36.4)     | 154                                | (34.5)     | 24                                | (57.1)     |
| Being Irritable, easily angered                      | 83                                 | (17.0)     | 70                                 | (15.7)     | 13                                | (31.0)     |
| Feeling Depressed or Tearful                         | 56                                 | (11.5)     | 47                                 | (10.5)     | 9                                 | (21.4)     |
| Feeling Frustrated or Impatient                      | 87                                 | (17.8)     | 73                                 | (16.3)     | 14                                | (33.3)     |
| Forgetfulness, poor memory                           | 87                                 | (17.8)     | 74                                 | (16.6)     | 13                                | (31.0)     |
| Poor Concentration                                   | 103                                | (21.1)     | 88                                 | (19.7)     | 15                                | (35.7)     |
| Taking Longer to Think                               | 80                                 | (16.4)     | 68                                 | (15.2)     | 12                                | (28.6)     |
| Blurred Vision                                       | 34                                 | (7.0)      | 27                                 | (6.0)      | 7                                 | (16.7)     |
| Light Sensitivity, easily upset by bright light      | 58                                 | (11.9)     | 50                                 | (11.2)     | 8                                 | (19.0)     |
| Double Vision                                        | 12                                 | (2.5)      | 11                                 | (2.5)      | 1                                 | (2.4)      |
| Restlessness                                         | 28                                 | (5.7)      | 26                                 | (5.8)      | 2                                 | (4.8)      |

**Online supplemental file 10. Characteristics of the population lost to follow-up for the validation cohort:  
assessment of patients at 7-days follow-up evaluation**

| <i>Rivermead Post-concussion Questionnaire items</i> | <i>Enrolled patients<br/>n=708</i> |            | <i>Validation cohort<br/>n=600</i> |            | <i>Lost to follow-up<br/>n=108</i> |            |
|------------------------------------------------------|------------------------------------|------------|------------------------------------|------------|------------------------------------|------------|
|                                                      | <i>n</i>                           | <i>(%)</i> | <i>n</i>                           | <i>(%)</i> | <i>n</i>                           | <i>(%)</i> |
| <i>At least 2 points</i>                             |                                    |            |                                    |            |                                    |            |
| Headaches                                            | 425                                | (60.0)     | 353                                | (58.8)     | 72                                 | (66.7)     |
| Feelings of Dizziness                                | 325                                | (45.9)     | 276                                | (46.0)     | 49                                 | (45.4)     |
| Nausea and/or Vomiting                               | 149                                | (21.0)     | 119                                | (19.8)     | 30                                 | (27.8)     |
| Noise Sensitivity, easily upset by loud noise        | 240                                | (33.9)     | 204                                | (34.0)     | 36                                 | (33.3)     |
| Sleep Disturbance                                    | 202                                | (28.5)     | 175                                | (29.2)     | 27                                 | (25.0)     |
| Fatigue, tiring more easily                          | 474                                | (66.9)     | 404                                | (67.3)     | 70                                 | (64.8)     |
| Being Irritable, easily angered                      | 225                                | (31.8)     | 187                                | (31.2)     | 38                                 | (35.2)     |
| Feeling Depressed or Tearful                         | 163                                | (23.0)     | 132                                | (22.0)     | 31                                 | (28.7)     |
| Feeling Frustrated or Impatient                      | 260                                | (36.7)     | 211                                | (35.2)     | 49                                 | (45.4)     |
| Forgetfulness, poor memory                           | 281                                | (39.7)     | 234                                | (39.0)     | 47                                 | (43.5)     |
| Poor Concentration                                   | 345                                | (48.7)     | 288                                | (48.0)     | 57                                 | (52.8)     |
| Taking Longer to Think                               | 307                                | (43.4)     | 262                                | (43.7)     | 45                                 | (41.7)     |
| Blurred Vision                                       | 127                                | (17.9)     | 102                                | (17.0)     | 25                                 | (23.1)     |
| Light Sensitivity, easily upset by bright light      | 246                                | (34.7)     | 207                                | (34.5)     | 39                                 | (36.1)     |
| Double Vision                                        | 32                                 | (4.5)      | 25                                 | (4.2)      | 7                                  | (6.5)      |
| Restlessness                                         | 78                                 | (11.0)     | 56                                 | (9.3)      | 22                                 | (20.4)     |
| <i>At least 3 points</i>                             |                                    |            |                                    |            |                                    |            |
| Headaches                                            | 253                                | (35.7)     | 207                                | (34.5)     | 46                                 | (42.6)     |
| Feelings of Dizziness                                | 143                                | (20.2)     | 118                                | (19.7)     | 25                                 | (23.1)     |
| Nausea and/or Vomiting                               | 56                                 | (7.9)      | 43                                 | (7.2)      | 13                                 | (12.0)     |
| Noise Sensitivity, easily upset by loud noise        | 139                                | (19.6)     | 114                                | (19.0)     | 25                                 | (23.1)     |
| Sleep Disturbance                                    | 128                                | (18.1)     | 105                                | (17.5)     | 23                                 | (21.3)     |
| Fatigue, tiring more easily                          | 303                                | (42.8)     | 256                                | (42.7)     | 47                                 | (43.5)     |
| Being Irritable, easily angered                      | 123                                | (17.4)     | 97                                 | (16.2)     | 26                                 | (24.1)     |
| Feeling Depressed or Tearful                         | 81                                 | (11.4)     | 65                                 | (10.8)     | 16                                 | (14.8)     |
| Feeling Frustrated or Impatient                      | 135                                | (19.1)     | 104                                | (17.3)     | 31                                 | (28.7)     |
| Forgetfulness, poor memory                           | 120                                | (16.9)     | 94                                 | (15.7)     | 26                                 | (24.1)     |
| Poor Concentration                                   | 183                                | (25.8)     | 153                                | (25.5)     | 30                                 | (27.8)     |
| Taking Longer to Think                               | 139                                | (19.6)     | 110                                | (18.3)     | 29                                 | (26.9)     |
| Blurred Vision                                       | 51                                 | (7.2)      | 42                                 | (7.0)      | 9                                  | (8.3)      |
| Light Sensitivity, easily upset by bright light      | 132                                | (18.6)     | 106                                | (17.7)     | 26                                 | (24.1)     |
| Double Vision                                        | 17                                 | (2.4)      | 13                                 | (2.2)      | 4                                  | (3.7)      |
| Restlessness                                         | 36                                 | (5.1)      | 25                                 | (4.2)      | 11                                 | (10.2)     |
